# Supplementary material for: Radiation Facility Volume and Survival for Men With Very High-Risk Prostate Cancer Treated with Radiation and Androgen Deprivation Therapy
Source: PubMed Central journal article supplement (PMC10410484; doi:10.1001/jamanetworkopen.2023.27637), 2023-08-08
Supplement: jamanetwopen-e2327637-s001.pdf [file jamanetwopen-e2327637-s001.pdf]

## Supplementary Online Content

Sebastian N, Goyal S, Liu Y, et al. Radiation facility volume and survival for men with very high-risk prostate cancer treated with radiation and androgen deprivation therapy. *JAMA Netw Open*. 2023;6(8):e2327637. doi:10.1001/jamanetworkopen.2023.27637

**eTable 1.** Overall Sample Distribution and Balance Check for Before and After IPSW

**eTable 2.** Multivariable Cox Proportional Hazards Model for Overall Survival Stratified by Facility Type

**eFigure.** Kaplan-Meier Overall Survival Plots for Patients Treated at High- vs Low-ACFV Centers, Stratified by Facility Type (Academic vs Nonacademic)

This supplementary material has been provided by the authors to give readers additional information about their work.

eTable 1. Overall Sample Distribution and Balance Check for Before and After IPSW

| Covariate                                           | Level                         | Study Sample Distribution |               | Absolute Standardized Difference(ASD) |       |
|-----------------------------------------------------|-------------------------------|---------------------------|---------------|---------------------------------------|-------|
|                                                     |                               | Before                    | After         | Before                                | After |
| Average Cumulative Facility Volume (optimal cutoff) | Overall                       | 24961 (100.0)             | 24940 (100.0) | -                                     | -     |
|                                                     | Low                           | 18585 (74.5)              | 18603 (74.6)  | -                                     | -     |
|                                                     | High                          | 6376 (25.5)               | 6338 (25.4)   | -                                     | -     |
| Age                                                 | < 65                          | 12430 (49.8)              | 12424 (49.8)  | 0.032                                 | 0.002 |
|                                                     | ≥ 65                          | 12531 (50.2)              | 12517 (50.2)  | 0.032                                 | 0.002 |
| Race                                                | White                         | 19656 (78.7)              | 19575 (78.5)  | 0.051                                 | 0.017 |
|                                                     | Black                         | 4264 (17.1)               | 4334 (17.4)   | 0.007                                 | 0.018 |
|                                                     | Other                         | 1041 (4.2)                | 1031 (4.1)    | 0.088                                 | 0.001 |
| Zip Code Median Income                              | ≥\$68,000                     | 7823 (31.3)               | 7731 (31)     | <b>0.252</b>                          | 0.014 |
|                                                     | \$48,000-\$67,999             | 6603 (26.5)               | 6580 (26.4)   | 0.092                                 | 0.007 |
|                                                     | \$38,000-\$47,999             | 5884 (23.6)               | 5898 (23.6)   | <b>0.122</b>                          | 0.004 |
|                                                     | <\$38,000                     | 4651 (18.6)               | 4732 (19)     | 0.072                                 | 0.02  |
| Zip Code Percentage Without High School Degree      | <7.0%                         | 5999 (24)                 | 6019 (24.1)   | <b>0.124</b>                          | 0.006 |
|                                                     | 7.0-12.9%                     | 8310 (33.3)               | 8298 (33.3)   | 0.005                                 | 0.002 |
|                                                     | 13.0-20.9%                    | 6515 (26.1)               | 6447 (25.9)   | 0.063                                 | 0.016 |
|                                                     | ≥21%                          | 4137 (16.6)               | 4176 (16.7)   | 0.079                                 | 0.009 |
| Insurance Type                                      | Medicaid/Uninsured            | 2507 (10)                 | 2561 (10.3)   | <b>0.117</b>                          | 0.02  |
|                                                     | Private                       | 6689 (26.8)               | 6657 (26.7)   | <b>0.163</b>                          | 0.007 |
|                                                     | Medicare                      | 15765 (63.2)              | 15723 (63)    | 0.081                                 | 0.006 |
| Facility Type                                       | Non-Academic/Research Program | 17339 (69.5)              | 17267 (69.2)  | <b>0.538</b>                          | 0.009 |
|                                                     | Academic/Research Program     | 7622 (30.5)               | 7673 (30.8)   | <b>0.538</b>                          | 0.009 |
| Charlson-Deyo Comorbidity Score                     | 0                             | 20688 (82.9)              | 20712 (83)    | <b>0.11</b>                           | 0.01  |
|                                                     | 1                             | 3294 (13.2)               | 3245 (13)     | 0.097                                 | 0.014 |
|                                                     | 2+                            | 979 (3.9)                 | 983 (3.9)     | 0.045                                 | 0.005 |

eTable 1. Overall Sample Distribution and Balance Check for Before and After IPSW

| Covariate                    | Level           | Study Sample Distribution |              | Absolute Standardized Difference(ASD) |       |
|------------------------------|-----------------|---------------------------|--------------|---------------------------------------|-------|
|                              |                 | Before                    | After        | Before                                | After |
| AJCC Clinical T-stage        | T1              | 9317 (37.3)               | 9276 (37.2)  | 0.073                                 | 0.005 |
|                              | T2              | 9015 (36.1)               | 9002 (36.1)  | 0.028                                 | 0     |
|                              | T3-4            | 6629 (26.6)               | 6663 (26.7)  | <b>0.108</b>                          | 0.006 |
| PSA                          | <10             | 10143 (40.6)              | 10126 (40.6) | 0.033                                 | 0.003 |
|                              | 10-20           | 5372 (21.5)               | 5311 (21.3)  | 0.003                                 | 0.012 |
|                              | >20             | 9446 (37.8)               | 9504 (38.1)  | 0.036                                 | 0.014 |
| Gleason score                | 6-7             | 1566 (6.3)                | 1586 (6.4)   | 0.071                                 | 0.003 |
|                              | 8-10            | 23395 (93.7)              | 23355 (93.6) | 0.071                                 | 0.003 |
| Total Radiation Dose (cat.)  | <74             | 4936 (19.8)               | 5044 (20.2)  | <b>0.19</b>                           | 0.021 |
|                              | >=74            | 20025 (80.2)              | 19896 (79.8) | <b>0.19</b>                           | 0.021 |
| Year of Diagnosis            | >=2004, <=2009  | 7245 (29)                 | 7392 (29.6)  | <b>0.157</b>                          | 0.025 |
|                              | >2009, <=2011   | 5451 (21.8)               | 5437 (21.8)  | 0.034                                 | 0.001 |
|                              | >2011, <=2014   | 8725 (35)                 | 8622 (34.6)  | 0.074                                 | 0.013 |
|                              | >2014, <=2016   | 3540 (14.2)               | 3489 (14)    | <b>0.154</b>                          | 0.016 |
| Distance to Facility (miles) | >=0, <=4.1      | 6259 (25.1)               | 6212 (24.9)  | <b>0.143</b>                          | 0.013 |
|                              | >4.1, <=9.1     | 6321 (25.3)               | 6407 (25.7)  | 0.021                                 | 0.02  |
|                              | >9.1, <=19.8    | 6145 (24.6)               | 6214 (24.9)  | 0.031                                 | 0.017 |
|                              | >19.8, <=2914.7 | 6236 (25)                 | 6107 (24.5)  | 0.086                                 | 0.024 |

\* The absolute standardized Difference (ASD) >= 0.1 is bold and indicates insufficient balance.

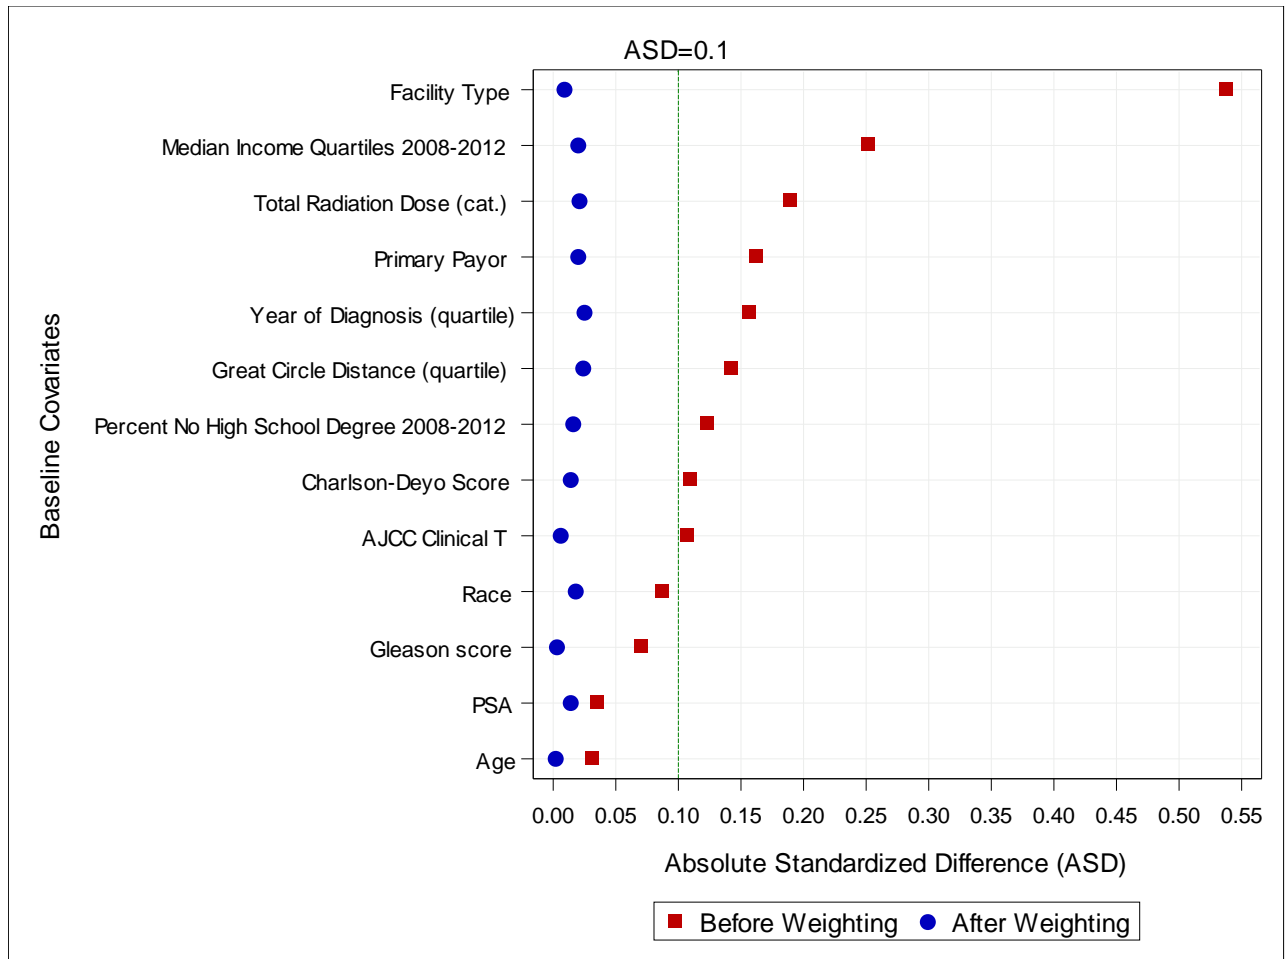

**eTable 2.** Multivariable Cox proportional hazards model for overall survival stratified by facility type

| Covariate                                           | Level                                                               | OS                       |                |                    |
|-----------------------------------------------------|---------------------------------------------------------------------|--------------------------|----------------|--------------------|
|                                                     |                                                                     | Hazard Ratio<br>(95% CI) | HR P-<br>value | Overall<br>P-value |
| <b>Comparisons Stratified by<br/>Facility Type:</b> | <b>Average Cumulative<br/>Facility Volume (optimal<br/>cutoff):</b> | -                        | -              | 0.39               |
| Non-Academic/Research Program                       | High vs. Low                                                        | 0.91 (0.84-0.98)         | <b>0.01</b>    | -                  |
| Academic/Research Program                           | High vs. Low                                                        | 0.86 (0.78-0.95)         | <b>0.003</b>   | -                  |

\* Number of observations in the original data set = 25219. Number of observations used = 25126.

\*\* Backward selection with an alpha level of removal of .05 was used. The following variables were removed from the model: Great Circle Distance (quartile), and Percent No High School Degree 2008-2012.

\*\*\* The estimated stratified treatment effect was controlled by: Age, Charlson-Deyo Score, Median Income Quartiles 2008-2012, Primary Payor, Race, Year of Diagnosis (quartile)

**eFigure.** Kaplan-Meier overall survival plots for patients treated at high- vs low-ACFV centers, stratified by facility type (academic vs nonacademic)

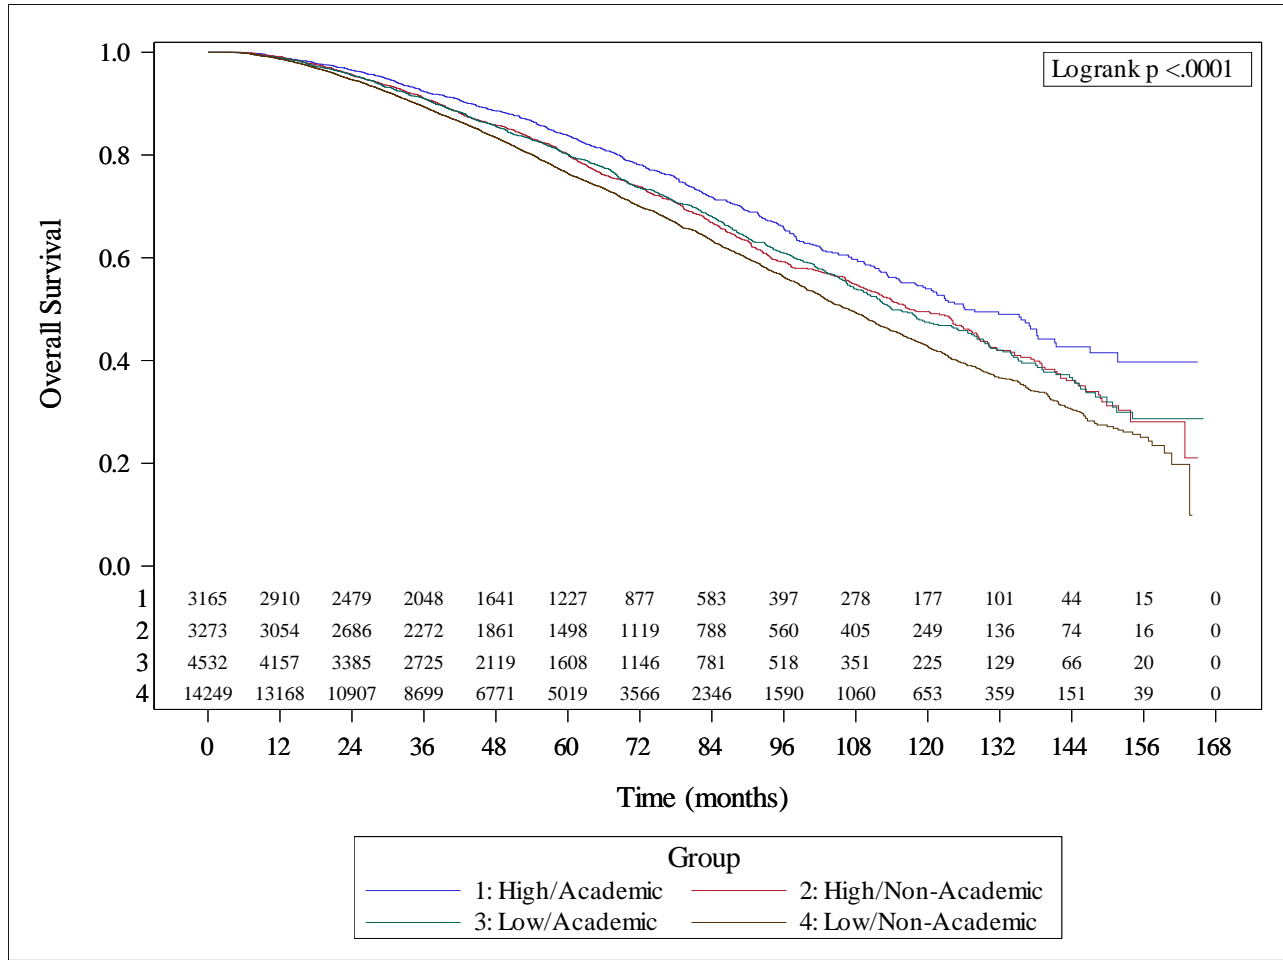

| Group             | No. of Subject | Event      | Censored    | Median Survival (95% CI) |
|-------------------|----------------|------------|-------------|--------------------------|
| High/Academic     | 3165           | 609 (19%)  | 2556 (81%)  | 126.2 (120.6, 138.2)     |
| High/Non-Academic | 3273           | 898 (27%)  | 2375 (73%)  | 117 (111.9, 124.7)       |
| Low/Academic      | 4532           | 986 (22%)  | 3546 (78%)  | 114 (110, 121.8)         |
| Low/Non-Academic  | 14249          | 3615 (25%) | 10634 (75%) | 106.8 (103.8, 109.4)     |
