# Supplementary material for: Radiation Facility Volume and Survival for Men With Very High-Risk Prostate Cancer Treated with Radiation and Androgen Deprivation Therapy
Source: PubMed Central journal article supplement (PMC10410484; doi:10.1001/jamanetworkopen.2023.27637), 2023-08-08
Supplement: jamanetwopen-e2327637-s002.pdf [file jamanetwopen-e2327637-s002.pdf]

## Data Sharing Statement

Sebastian. Radiation Facility Volume and Survival for Men With Very High-Risk Prostate Cancer Treated with Radiation and Androgen Deprivation Therapy. *JAMA Netw Open*. Published August 08, 2023. doi:10.1001/jamanetworkopen.2023.27637

### Data

**Data available:** No

### Additional Information

**Explanation for why data not available:** The National Cancer Database is available to those institutions who participate in the Commission-on-Cancer consortium.
